# Supplementary material for: Factors Influencing the Effects of Triticale on Laying Hens’ Performance: A Meta-Analysis
Source: Preprints.org preprint supplement (doi:10.20944/preprints202405.0281.v1), 2024-05-06
Supplement: Supplementary file 1 [file supplementary]

## Sheet: Sheet1
author	year	pcontrol_tstrain	n.c	mean.c	sd.c	n.e	mean.e	sd.e	group	percentage
Lim et al (a)	2021	Joesong	72	55.45	0.394	72	55.61	0.394	Hy-line Brown	5
Lim et al (b)	2021	Joesong	72	55.45	0.394	72	55.62	0.394	Hy-line Brown	10
Lim etal (c)	2021	Joesong	72	55.45	0.394	72	56.18	0.394	Hy-line Brown	15
Lim et al (d)	2021	Joesong	72	55.45	0.394	72	55.55	0.394	Hy-line Brown	20
